# Supplementary material
Source: MDPI journal article supplement (https://www.mdpi.com/2071-1050/11/10/2937)

## APPENDIX C: LIST OF STATEMENTS

TABLE C1. NGT Q1

### 1) ¿Cuáles son los beneficios de la presencia de las tortugas en Galápagos?

Según su criterio, ordene de acuerdo a la importancia los siguientes enunciados:

Donde **1** es lo menos importante y **5** lo más importante.

**Por favor, si considera necesario añada otros enunciados relevantes**

| Lista de enunciados                           | Ranking<br>(1-5) |
|-----------------------------------------------|------------------|
| Son importantes para el turismo y economía    |                  |
| Son importantes para la ciencia               |                  |
| Son importantes para nuestra identidad        |                  |
| Son animales carismáticos                     |                  |
| Son las ingenieras ecosistémicas de las islas |                  |
|                                               |                  |
|                                               |                  |
|                                               |                  |
|                                               |                  |
|                                               |                  |

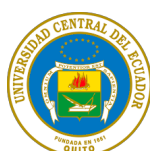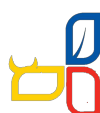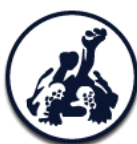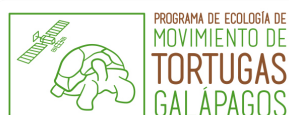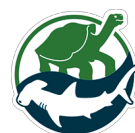

## APPENDIX C: LIST OF STATEMENTS

TABLE C2. NGT Q2

### 2) ¿Cuáles son los problemas de que enfrentan las tortugas en Santa Cruz?

Según su criterio, ordene de acuerdo a la importancia los siguientes enunciados:  
Donde **1** es lo menos importante y **5** lo más importante.

Por favor, si considera necesario añada otros enunciados relevantes

| Lista de enunciados                                                                                                                                       | Ranking<br>(1-5) |
|-----------------------------------------------------------------------------------------------------------------------------------------------------------|------------------|
| Bloqueo en sus rutas migratorias por el uso de cercas                                                                                                     |                  |
| Bloqueo en sus rutas migratorias por la subdivisión de tierras                                                                                            |                  |
| Bloqueo en sus rutas migratorias por el abandono de las tierras y crecimiento de plantas invasivas como la mora (barrera vegetativa)                      |                  |
| Las carreteras y vías secundarias pueden ser un problema tanto por posibles colisiones con automóviles como por la fragmentación de las rutas migratorias |                  |
| Problemas de salud por la interacción cercana con el ganado vacuno (p.ej. por el uso de antibióticos)                                                     |                  |
|                                                                                                                                                           |                  |
|                                                                                                                                                           |                  |
|                                                                                                                                                           |                  |
|                                                                                                                                                           |                  |
|                                                                                                                                                           |                  |

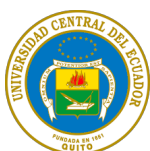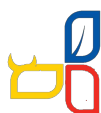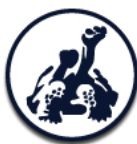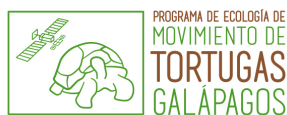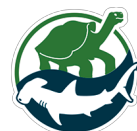

## APPENDIX C: LIST OF STATEMENTS

TABLE C3. NGT Q3

### 3) ¿Cuáles son los problemas que ocasionan las tortugas en sus tierras/actividad?

Según su criterio, ordene de acuerdo a la importancia los siguientes enunciados:  
Donde **1** es lo menos importante y **5** lo más importante.

Por favor, si considera necesario añada otros enunciados relevantes

| Lista de enunciados                                     | Ranking<br>(1-5) |
|---------------------------------------------------------|------------------|
| Destruyen cultivos de ciclo corto                       |                  |
| Destruyen cultivos perennes en crecimiento (p.ej. café) |                  |
| Rompen las cercas                                       |                  |
| Quiten agua y alimento (pastos) al ganado vacuno        |                  |
| Bloquean la carretera y vías acceso a las propiedades   |                  |
|                                                         |                  |
|                                                         |                  |
|                                                         |                  |
|                                                         |                  |
|                                                         |                  |

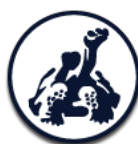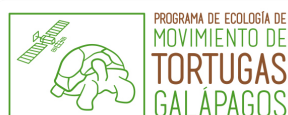

## APPENDIX C: LIST OF STATEMENTS

TABLE C4. NGT Q4

### 4) ¿Qué soluciones, estrategias y/o acciones sugiere para permitir la migración de las tortugas y evitar daños en sus tierras?

Según su criterio, ordene de acuerdo a la importancia los siguientes enunciados:  
Donde **1** es lo menos importante y **5** lo más importante.

| Lista de enunciados                                                                                                                                                        | Ranking<br>(1-5) |
|----------------------------------------------------------------------------------------------------------------------------------------------------------------------------|------------------|
| Proporcionar incentivos económicos para la construcción de infraestructura turística en lugar de la agricultura.                                                           |                  |
| Promover cultivos que no sean dañados por las tortugas como: naranjas, cacao y teca para madera.                                                                           |                  |
| Promover el mercado agrícola local, en particular, para aquellos cuya subsistencia se basa únicamente en la agricultura.                                                   |                  |
| Diseñar cercas anti-tortugas eficientes que no causen daños a las tortugas ni a los productores así como corredores ecológicos que permitan su migración por la zona rural |                  |
| Construir y establecer más cercas (no dañinas) en el lado del PNG.                                                                                                         |                  |
|                                                                                                                                                                            |                  |
|                                                                                                                                                                            |                  |
|                                                                                                                                                                            |                  |
|                                                                                                                                                                            |                  |
|                                                                                                                                                                            |                  |

Por favor, si considera necesario añada otros enunciados relevantes



Supplement: s1 [file s1]
