# Supplementary material
Source: MDPI journal article supplement (https://www.mdpi.com/2071-1050/11/10/2937)

## APPENDIX A

**Table A1. Detail by activities of the programme during the participatory workshop:  
HUMAN-GIANT TORTOISE INTERACTIONS IN SANTA CRUZ, GALAPAGOS**

| Activity                                                                                                                                                                                                    |                              | Time   | Duration (minutes) |
|-------------------------------------------------------------------------------------------------------------------------------------------------------------------------------------------------------------|------------------------------|--------|--------------------|
| Registry/reception                                                                                                                                                                                          |                              | 09:00  | 30'                |
| Introduction to the workshop                                                                                                                                                                                | <i>Dr. Benítez Capistros</i> | 09:30  | 10'                |
| <b>Presentations</b>                                                                                                                                                                                        |                              |        |                    |
| • Macro-economy and production in Galapagos.                                                                                                                                                                | <i>P. Couenberg</i>          | 09:40  | 15'                |
| • Social-ecological studies                                                                                                                                                                                 |                              |        |                    |
| - Conservation discourses and conflicts in Galapagos                                                                                                                                                        | <i>Dr. Benítez Capistros</i> | 09:55  | 15'                |
| - Giant tortoise migration and ecology                                                                                                                                                                      | <i>F. Cabrera</i>            | 10:10  | 15'                |
| • Project presentation: 'Long distance migration of giant tortoises: towards and adequate management of private lands'                                                                                      | <i>Dr. Nieto</i>             | 10:25  | 15'                |
| Formation of work groups in tables                                                                                                                                                                          |                              | 10:40  | 10'                |
| Explanation and use of the Nominal Group Technique (NGT)                                                                                                                                                    |                              | 10:50  | 10'                |
| Delivery of informative fact sheets                                                                                                                                                                         |                              | 11:00  | 10'                |
| <b>Break</b>                                                                                                                                                                                                |                              | 11:10  | 30'                |
| <b>Work to do in each table (NGT)</b>                                                                                                                                                                       |                              |        |                    |
| 1. Individual analysis of the most important problems or benefits about farmers productions and the relationship with the presence of giant tortoises                                                       |                              | 11:40  | 45'                |
| 2. Sharing and recording of ideas                                                                                                                                                                           |                              | 12:25  | 45'                |
| 3. Group discussion and clarification of ideas. Identification of solutions and strategies of the problems regarding the migration of giant tortoises between the national park and the rural area (NGT Q4) |                              | 13:10  | 45'                |
| 4. Vote and ranking of the ideas obtained by NGT (Q1-Q4)                                                                                                                                                    |                              | 13: 55 | 30'                |
| - General visualization of results (consensus / dissensus)                                                                                                                                                  |                              |        |                    |
| <b>Lunch invitation</b>                                                                                                                                                                                     |                              | 13:25  | 95'                |
| Workshop closure and delivery of participation certificates                                                                                                                                                 |                              | 15:00  | 30'                |

**Place:** Pájaro Brujo, Santa Rosa. **Date and Time:** Thursday 12 April, 2018 , 9:00 am.

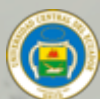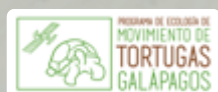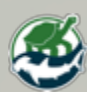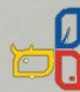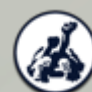

Supplement: s1 [file s1]
