# Supplementary material
Source: MDPI journal article supplement (https://www.mdpi.com/2071-1050/11/10/2937)
Supplement: s1 [file s1]

## **APPENDIX B. INFORMATIVE FACTSHEETS B1-B5**

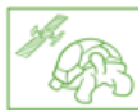

PROGRAMA DE ECOLOGIA DE  
MOVIMIENTO DE  
TORTUGAS  
GALAPAGOS

TALLER PARTICIPATIVO: INTERACCIONES  
TORTUGAS-HUMANOS

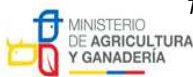

## 1. Historia de Galápagos

### 1535. Descubrimiento

A diferencia de otros archipiélagos oceánicos, Galápagos se descubre tarde y con poco interés en sus recursos naturales.

**1600-1800.** Galápagos es un importante punto de extracción de recursos marinos (ballenas y lobos). Las tortugas terrestres también son extraídas con fines alimenticios.

**1832-1839.** La primera colonia Ecuatoriana en la isla Floreana con la finalidad de extraer tintes de líquenes. Se plantan cultivos y traen animales (cerdos, vacas, perros, gatos) para la subsistencia de los 120 colonos.

**1938.** Colonos migran a San Cristóbal por la falta de agua y las dificultades de siembra.

**1869-1878.** Segunda colonia en Floreana.

**1879-1905.** Manuel J. Cobos se establece en San Cristóbal con el ingenio azucarero *El Progreso*. Tiene 800 cabezas de ganado y cultiva 107 hectáreas de tierras para la subsistencia de sus 400 trabajadores. En 1905 se estima habían 10000 plantas de café para exportación. Por igual, el aceite de tortuga se explota y se vende para el alumbrado de Guayaquil, lo cual conlleva a su extinción en la isla.

**1905-1939.** Más intentos de colonización permanentes en Isabela, Santa Cruz, San Cristóbal y Floreana

**1920-1928.** Demanda creciente por parcelas de tierras que atrae Noruegos, Alemanes y Austriacos.

**1929-1934.** Alemanes y Austriacos se establecen en Floreana (La leyenda de la Baronesa).

**1936.** Primera declaración de conservación por parte del Estado Ecuatoriano.

**1940-1946.** Establecimiento de las bases militares de Estados Unidos en Baltra.

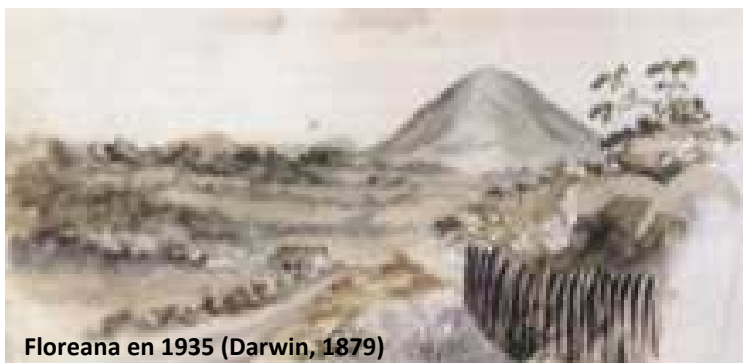

Floreana en 1935 (Darwin, 1879)

## PRODUCCIÓN AGROPECUARIA

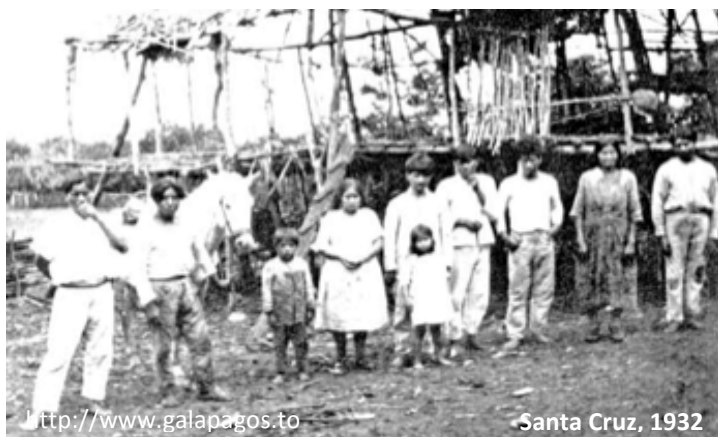

<http://www.galapagos.to>

Santa Cruz, 1932

## 2. Movimientos sociales y distribución de tierras

El sector agrícola de Galápagos permanece pequeño y poco desarrollado hasta finales de la década de los **1940s** cuando el esquema de latifundios cambia gradualmente a minifundios, oficialmente después de la primera reforma agraria en 1964. En **1950** la agricultura deja de ser predominante debido a la pesca.

Entre **1950** y **1960** los eventos catastróficos del continente (terremotos y sequías) favorecen una gran inmigración de personas al archipiélago. Algunos de estas personas se dedican a la agricultura siempre y cuando pudiesen apropiarse de las tierras pero el resto se dedica a la pesca y el comercio. Sin embargo, más y más las personas que viven en las partes altas de las Islas y dedicadas a la agricultura, descienden a las zonas costeras para participar de las actividades de pesca, en particular de Bacalao y langostas.

Después de que Galápagos se declara Provincia en **1974**, se empieza un proceso de legalización de las tierras que termina en 1980. El desarrollo agrícola incrementa notablemente pero cada vez requiere mayor número de trabajadores. En la década de **1980** varias familias del continente se establecen en el sector agrícola y son actualmente el grupo de productores más importantes de Galápagos.

### 3. El turismo en Galápagos

El turismo en Galápagos inicia a finales de la década de 1960 pero con un pico marcado de crecimiento económico entre 1974 y 1980. Desde entonces, la isla de Santa Cruz ha sido el centro de operaciones debido a su localización geográfica central, el aeropuerto de Baltra y las sedes de la Dirección Parque Nacional Galápagos y Fundación Charles Darwin. El turismo ha mejorado la economía de Santa Cruz y el archipiélago, llegando a ser la **principal actividad económica** del archipiélago. Sin embargo, también ha ocasionado el **abono de las tierras agrícolas** en las partes altas. Dicho abandono facilita la **proliferación** de algunas **especies invasoras** como la mora que, entre otras cosas, se convierte en una **barrera vegetativa** para la **migración** de las tortugas entre el parque y la zona rural.

### 4. La producción agropecuaria

En 1959, Galápagos fue declarado Parque Nacional; de la superficie total terrestre de aproximadamente 799.771 hectáreas, **26.245 hectáreas (3%)** fueron destinadas para el aprovechamiento humano repartidas en las islas Santa Cruz, San Cristóbal, Isabela, Floreana y Baltra. En base a los datos del **Censo de Unidades de Producción Agropecuaria de Galápagos del año 2014**, un total de **19.010 hectáreas** son terrenos que conforman los **755 Unidades de Producción Agropecuaria (UPA)** distribuidas de la siguiente manera: el 47% en Santa Cruz, el 34% en San Cristóbal, el 17% en Isabela y el restante 2% en Floreana. A esto se puede añadirse una de UPA de una hectárea en la zona protegida del PNG en la cual se siembra y cosecha Otoy para alimentar a las tortugas terrestres en el Centro de Crianza en San Cristóbal.

El uso más extendido del **suelo rural de Galápagos** está destinado a **pastos ocupando 11.126 hectáreas** que es 59% del superficie total de las UPA. Los otros usos están destinados a **cultivos permanentes (8%)**, **cultivos transitorios (1%)**, **barbecho (0.6%)**, **descanso (2%)**, **otros usos (3%)**.

La superficie que no está aprovechada para fines agropecuarios está cubierta por bosque o montes no invasoras (22%), además existen **934 hectáreas (5%) con especies invasoras**.

De los **cultivos permanentes** 534 hectáreas son asociados y 983 hectáreas son monocultivos ocupados principalmente por café (723 ha.), guineo (98 ha.), plátano (72 ha.), caña de azúcar (24 ha.), piña (22 ha.) y naranja (21 ha.).

En cuanto a los **cultivos de ciclo corto** (transitorios) los principales son el maíz (65 ha.), yuca (54 ha.), sandía (8 ha.), tomate riñón (4,3 ha.), otoy (3,8 ha.), papa (2,7 ha.), frejol (2,7 ha.) y pimiento (2,5 ha.).

El total del superficie de **11.126 hectáreas de pastos**, el 69% (7.629 ha.) están ocupadas con monocultivos y el restante 31% por cultivos asociados entre pastos. El monocultivo más extendido es el **pasto Elefante**, seguido de lejos por el Brachiaria y otros tipos tales como King Grass, Tanzania, Estrella, Saboya, etc.

En el 2014 hubo **10.100 cabezas de ganado bovino** en la provincia con la mayor cantidad, **6.740 bovinos (68%) en Santa Cruz**. La relación entre hembras y machos es siete hembras por cada tres machos por razones de reproducción y obtención de leche. El 65% del ganado vacuno es destinado a la producción de carne y el 35% son productoras de leche; 35% de las productoras de leche están en ordeño (1.248 cabezas de las 3.532 productoras). También se registró la existencia de 3.651 ganado porcino y un total de 91.930 aves entre gallinas, gallos y pollos.

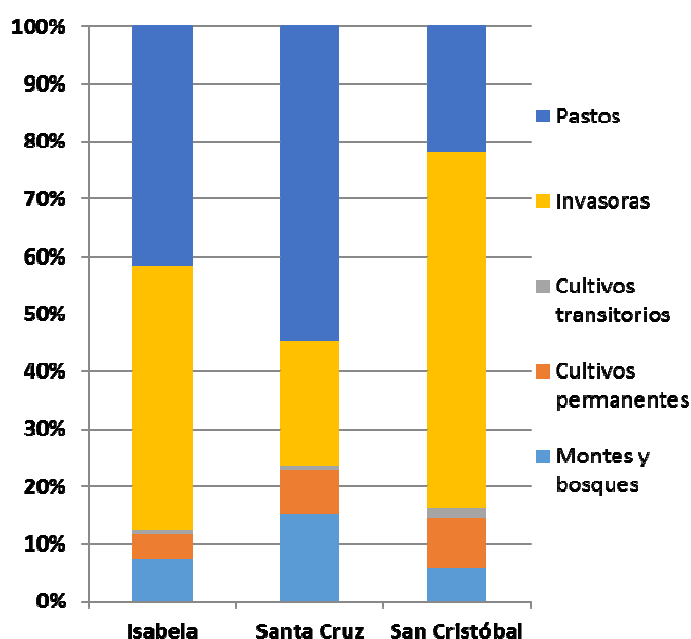

Fuente: Censo de Unidades de Producción Agropecuario de Galápagos 2014

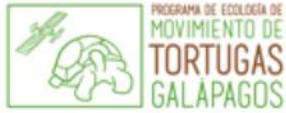

TALLER PARTICIPATIVO: INTERACCIONES  
TORTUGAS-HUMANOS

## 1. Aspectos institucionales

### Funciones

**CGREG:** El Consejo de Gobierno es el ente encargado de la planificación, el manejo de los recursos, la organización de las actividades que se realicen en el territorio de la provincia de Galápagos y la coordinación interinstitucional con las instituciones del Estado, en el ámbito de sus competencias.

**MAG:** Gestionar y ejecutar los recursos económicos financieros, la asistencia técnica y el acompañamiento directo a los usuarios del sector; a fin de proveerlos de las capacidades necesarias para desarrollar las potencialidades productivas del territorio. Se registrará sobre las disposiciones técnicas y legales que le corresponde a la región especial.

**MAE: PNG – ABG:** ejercer jurisdicción y competencia sobre el uso, manejo y aprovechamiento de los recursos naturales y las actividades que en dichas áreas se realicen de conformidad con el Sistema Nacional de Áreas Protegidas, en concordancia con el PDOT.

**MITUR:** planificar, normar y controlar los niveles mínimos en la calidad de los servicios turísticos. En conjunta con la Autoridad Ambiental expedir políticas de gestión para el fortalecimiento del turismo sostenible en la provincia de Galápagos.

**FCD:** organización científica internacional con la vocación de proporcionar conocimientos científicos y asistencia técnica para asegurar la conservación de Galápagos.

## MACRO LEGAL

### 2. Legislación: LOREG

**Artículo 1.- Objeto y ámbito.** La presente Ley Orgánica regula el Régimen Especial de la provincia de Galápagos e instituye el régimen jurídico administrativo (...) en función de un estricto apego a los principios de conservación del patrimonio natural del Estado y del Buen Vivir.

**Artículo 5.- Competencias del Consejo de Gobierno.**

**19.** Fomentar la soberanía y seguridad alimentaria y la producción agroecológica, acorde con lo dispuesto en la legislación vigente, el PDOT de Galápagos y la normativa y políticas definidas por la autoridad nacional competente, en cumplimiento de la legislación ambiental aplicable.

**20.** Fomentar las actividades económicas y productivas provinciales en el marco de la sostenibilidad de territorio provincial.

**Artículo 76.- Política de Desarrollo Agropecuario.**

1) Se enmarcarán en los objetivos de conservación de los ecosistemas a fin de minimizar los impactos negativos sobre ellos. Deberán orientarse a:

- a) Mejorar el autoabastecimiento de las poblaciones locales y satisfacer las demandas originadas por la actividad turística.
- b) Reducir el ingreso de productos de fuera de las islas.
- c) Controlar y minimizar el ingreso de especies animales y vegetales exóticas.

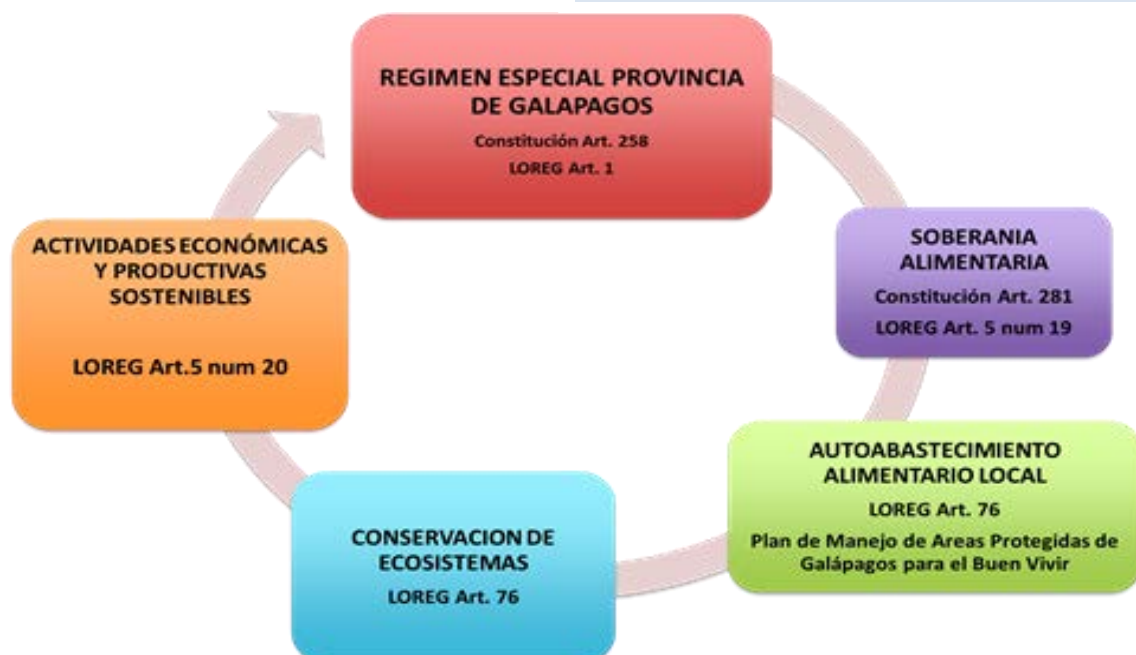



### 3. Plan de Desarrollo y Ordenamiento Territorial (PDOT)

Los objetivos estratégicos del PDSOT son:

- Impulsar la sociedad del conocimiento.
- Consolidar el patrimonio cultural y natural de las islas.
- Reducir el nivel de dependencia del continente.
- Asegurar la Gobernabilidad del territorio dentro de un modelo de desarrollo acorde a las especificidades insulares

**Diagrama 01-**  
**Alineamiento entre necesidades nacionales y locales para el PDOT de Galápagos**

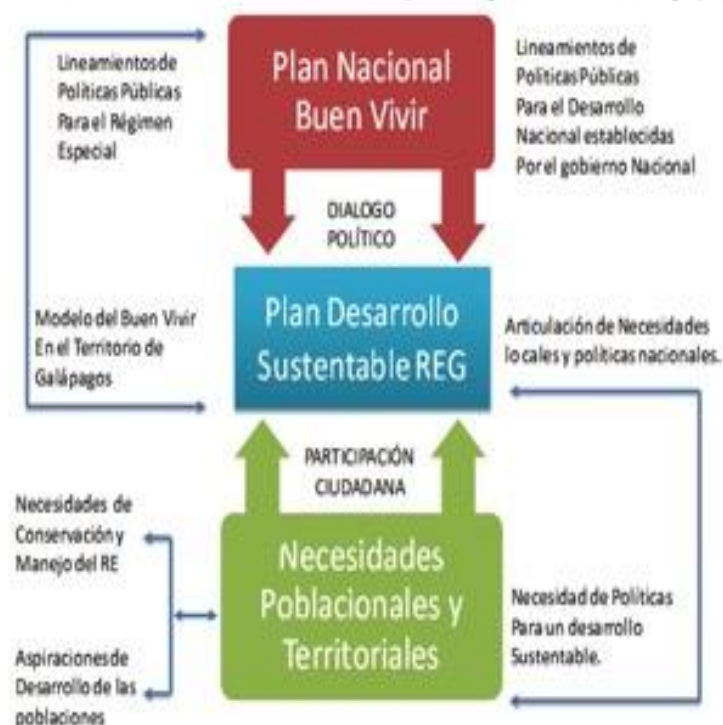

**Diagrama 02-**  
**Articulación de Necesidades en el PDOT Galápagos**

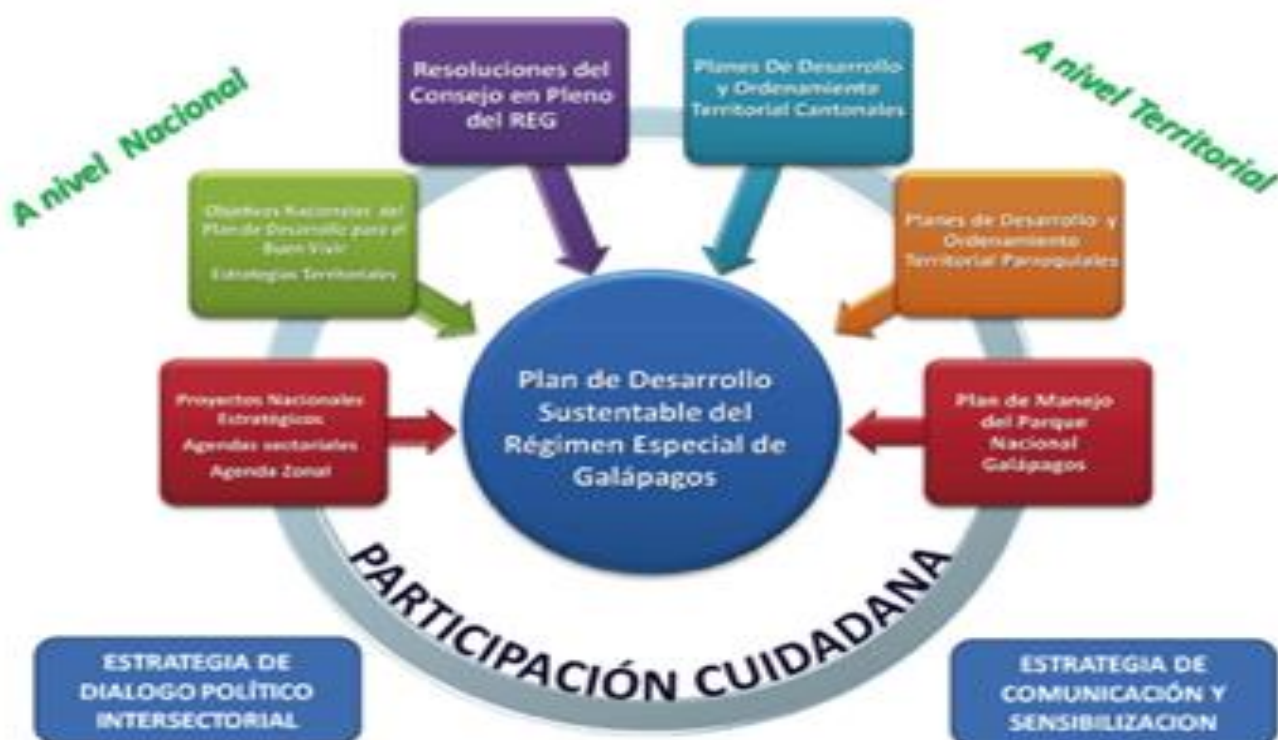

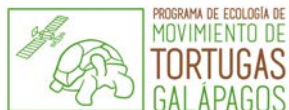

TALLER: INTERACCIONES TORTUGAS-HUMANOS

## Las icónicas tortugas de Galápagos

Las especies icónicas, como las tortugas gigantes de Galápagos, son especies carismáticas que sirven de símbolo para incrementar la conciencia ambiental. Se han utilizado como medios para promover estrategias de manejo ambiental, interés público, desarrollo económico y agendas políticas nacionales e internacionales. Además, tienen un gran potencial para movilizar las acciones sociales en contextos políticos y económicos de conservación. Con el tiempo, las características icónicas de las tortugas gigantes de Galápagos (p.ej. dóciles, carismáticas) y sus representaciones las han convertido en omnipresentes en el archipiélago. Se usan como nombres en tiendas, restaurantes, ONGs, escuelas e incluso como logotipo de partidos políticos.

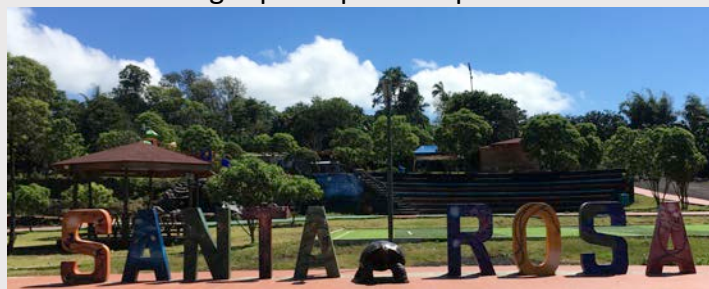

El éxito de su crianza en cautiverio, los programas de restauración y repatriación han ayudado a promover el turismo y la concientización sobre su conservación en las cuatro islas habitadas. Sin embargo, el hecho de ser una especie icónica, no implica una eficacia en las medidas de conservación y/o una amplia aceptación. De hecho, problemas han surgido como las eventuales matanzas de tortugas en la isla de Isabela debido a creencias locales (p.ej. ayuda nutricional en el posparto) y represalias contra el parque nacional Galápagos (PNG) y conservacionistas.

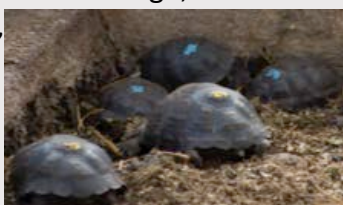

Aunque se ha asumido que las especies icónicas, como las tortugas gigante de Galápagos, tienen un valor intrínseco en la sociedad, existen diferentes perspectivas y discursos sobre los valores de la naturaleza y sus especies icónicas en Galápagos.

## DISCURSOS DE CONSERVACIÓN

### Los discursos sobre las tortugas de Galápagos

Un discurso es la forma **compartida** y **estructurada** de **hablar, pensar, interpretar** y **representar** cosas en el mundo. Los discursos hacen que nuestras **prácticas** y **acciones** tengan **sentido** en las realidades físicas y sociales en las que vivimos. Por ello, el análisis de discursos en **especies icónicas**, como las tortugas gigantes, nos puede permitir **entender** el **rol** que tienen no solo para la **conservación**, sino también para el **desarrollo social**, la **ciencia** y la **identidad cultural** en el archipiélago de Galápagos. En el 2014, nuestro estudio reveló que en Galápagos existen cuatro discursos en torno a la tortuga gigante de Galápagos:

1. Gobernanza con múltiples actores

2. Conservación de tortugas y ecosistemas

Cuatro discursos asociados a

la tortuga gigante de Galápagos

3. Gobernanza comunitaria

4. Mercado y turismo

**Referencia:** Benítez-Capistrós et al. (2016). Exploring conservation discourses in the Galapagos Islands: A case study of the Galapagos giant tortoises. *Ambio*, 1-19.

## 1. Gobernanza con múltiples actores

Discurso que se enfoca en mejorar aspectos sociales y de gobernanza de Galápagos. En general se enfatiza en la economía de Galápagos donde la conservación se considera debe ser económicamente rentable. Para los adherentes de este discurso, la conservación solo funcionará con el involucramiento de la comunidad y otros actores. La conservación de las tortugas, si bien relevante, no se considera importante para la economía del archipiélago. Este discurso enfatiza en la diversificación de actividades productivas y en políticas de educación ambiental.

“Hay componentes del gobierno que no están funcionando. Esta es la razón por la que la gobernanza y la educación ambiental y, en general, los problemas sociales son mandatorios. Si se corrige esto, todos, incluidas las tortugas gigantes, tendrán la oportunidad de prosperar.”

## 2. Conservación de tortugas y ecosistemas

Discurso que se centra en la conservación de las tortugas gigantes como una prioridad debido a su valor ecológico, científico y socioeconómico. Sin embargo también se considera por igual la conservación de los ecosistemas. El éxito de la conservación de Galápagos se atribuye a las políticas públicas y sus instituciones. Adherentes de este discurso consideran que promover un sentido de responsabilidad en conservación en todas las instituciones de Galápagos es más importante que cambios políticos o instituciones.

“Todo lo que se hace en las áreas urbanas o rurales afecta las áreas protegidas y viceversa. Tenemos que romper el esquema de que el PNG es el único responsable de la conservación”

## En conclusión

- Las diferentes opiniones expresadas en cada discurso reflejan los valores asociados con las tortugas gigantes, los dilemas de conservación y cuestiones sociopolíticas que rigen las acciones de conservación en Galápagos.
- Es importante notar que ningún discurso niega la importancia de las tortugas gigantes en el archipiélago.
- A pesar de que existen elementos consensuales entre todos los discursos, es en circunstancias cambiantes cuando los diferentes valores/puntos de vista que existen (disenso), los que pueden facilitar a las partes interesadas a adoptar diferentes estrategias.
- La conservación necesita una pluralidad de puntos de vista para que los actores puedan construir relaciones más honestas, adaptables y efectivas entre sí y con el público en general.

## 3. Gobernanza comunitaria

Los adherentes de este discurso reflejan las preocupaciones de las comunidades locales, particularmente en términos de necesidades sociales e inclusión. Se enfatiza el empoderamiento de la comunidad sobre cambios institucionales pero también sobre la necesidad de que el PNG haga un mayor esfuerzo en relacionarse con la comunidad. En este discurso, los humanos y la naturaleza se consideran iguales y se afirma que existe un deber moral de proteger a las tortugas gigantes. Las tortugas se consideran carismáticas e importantes para atraer turistas. Aunque se considera la importancia del estudio en tortugas, también se considera que no hay divulgación del conocimiento científico sobre tortugas

“El conocimiento científico de las tortugas gigantes debe divulgarse para que la gente sepa lo que se está haciendo. Esto es importante porque muchas personas se quejan de que no saben lo que los científicos están haciendo y si va a funcionar o ser útil para algo.”

## 4. Mercado y turismo

Este discurso concuerda que la conservación debe enfocarse en especies icónicas. La conservación de las tortugas gigantes se considera importante por estar relacionadas al turismo, economía y ciencia. Si bien no se considera a las tortugas como productos comerciales se quiere promover a la tortuga para fines turísticos. Este discurso también respalda promoción de otros sectores productivos además del turismo.

“Otros sectores, como la pesca, deberían promoverse porque a veces el turismo disminuye y la economía de las islas, que depende del turismo, se ve afectada y todos se ven afectados. Entonces, si hay otras actividades, estas pueden ayudar a compensar.”



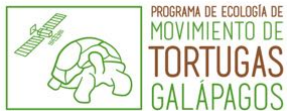

TALLER: INTERACCIONES TORTUGAS-HUMANOS

## ¿Qué es un conflicto en conservación?

Entender un conflicto de conservación requiere el estudio de las interacciones entre las actividades humanas y otras especies en sus entornos naturales o silvestres. Si bien estas interacciones suelen denominarse conflictos entre humanos y vida silvestre (CHVS), esta definición es confusa ya que asume que las especies silvestres son rivales conscientes de los humanos. Por ello, una definición más neutral define a los conflictos de conservación como:

*“Situaciones que ocurren cuando dos o más partes con opiniones fuertes chocan sobre los objetivos de conservación; y cuando una de estas partes se percibe esta ejerciendo sus intereses a expensas del otro.”*

Esta definición explica entonces que los conflictos de conservación son básicamente entre humanos y que entonces, resolver los conflictos requiere un acercamiento inter y trans-disciplinario de las ciencias naturales, sociales y humanas.

## ¿Dónde ocurren los conflictos?

Típicamente, los conflictos de conservación ocurren en las Áreas Protegidas (APs) y sus alrededores (áreas urbanas y rurales) porque los hábitats o espacios de las especies han sido disminuidos, forzándolas a incurrir en territorios humanos donde actividades como el urbanismo o la agricultura se expanden y/o desarrollan. En Galápagos sin embargo, el caso es opuesto ya que las áreas protegidas son las que rodean las áreas rurales y urbanas.

Caso típico

Caso Galápagos

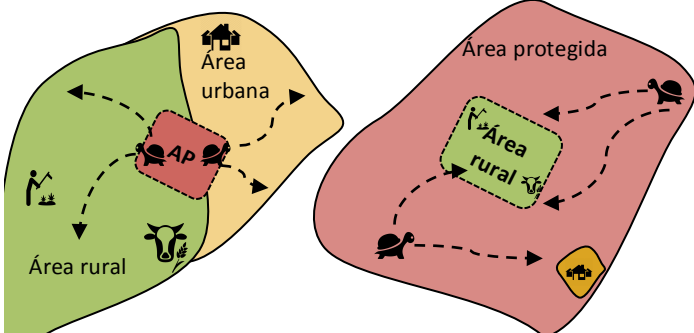

# CONFLICTOS DE CONSERVACIÓN

## Se necesita un balance para manejar conflictos de conservación

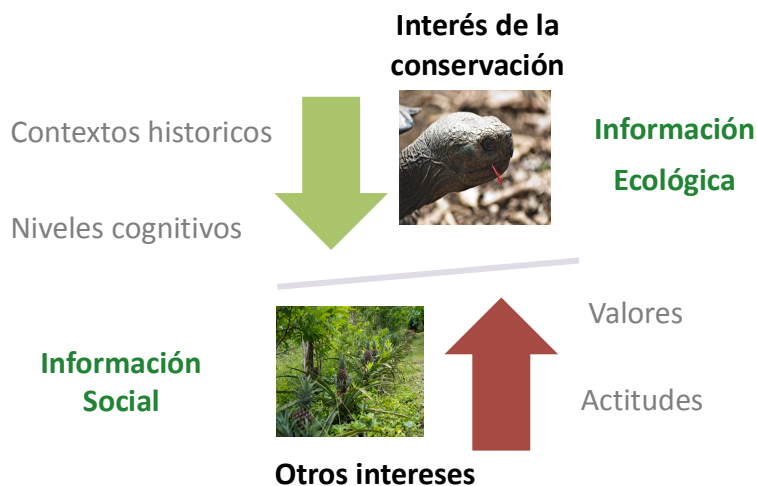

## El caso de Galápagos y las tortugas gigantes

En las Islas Galápagos, los primeros asentamientos humanos se establecieron en 1832 y poco más de un siglo después, en 1959, el Parque Nacional se estableció siguiendo un enfoque excluyente de conservación, permitiendo asentamientos humanos en 4 islas: Isabela, Santa Cruz, San Cristóbal y Floreana, en el 3% del territorio total (7880 km<sup>2</sup>). Para ese entonces, las tortugas gigantes de Galápagos (*Chelonoidis* spp.) estuvieron al borde de la extinción después de siglos de depredación por piratas, cazadores de focas y balleneros en el siglo 18, y luego durante el siglo 19 y 20 por su excesiva caza. A pesar de la extinción de 4 de 15 especies, los esfuerzos para recuperar poblaciones han sido particularmente exitosos en los últimos 50 años. A través de programas locales de cría en cautiverio y restauración, hoy se conservan 11 de las 15 especies diferentes en 6 islas: Española, Santiago, Pinzón, Isabela, San Cristóbal y Santa Cruz. Esta situación le ha dado a las tortugas gigantes de Galápagos una ventaja en términos de conflictos de conservación con los humanos porque 8 de las 11 especies existentes no tienen una interferencia directa con actividades humanas.

**Referencia:** Benitez-Capistros et al. Emergent conservation conflicts in the Galapagos Islands: Human-giant tortoise interactions in the rural area of Santa Cruz Island. *PLOS ONE* (in review).



## Conflicto de conservación emergente en Santa Cruz, Galápagos

Las tortugas gigantes de Santa Cruz están divididas por tierras de cultivo en dos especies: *C. porteri* en el suroeste y *C. donfaustoi* en el sureste. Como el único mega-herbívoros que prosperó en Galápagos, el papel ecológico de las tortugas a través de la dispersión de semillas, el pisoteo y el ciclo de nutrientes es clave para el funcionamiento de los ecosistemas. Sin embargo, los asentamientos humanos donde se han desarrollado actividades como la agricultura, ganadería y ecoturismo local, han invadido las rutas migratorias de las tortugas.

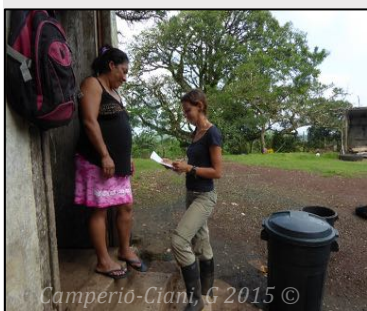

Gracias a la participación de los productores de la zona rural de Santa Cruz, ahora contamos con información que nos permite dar los primeros pasos para la resolución del conflicto.

## Las percepciones y actitudes de los productores hacia las tortugas

Nuestros resultados muestran que solo 37% del total de entrevistados (n=102) tienen una percepción negativa sobre las tortugas. Sin embargo, también pudimos determinar que independientemente de la percepción, los productores con pequeñas parcelas de tierra, que producen cultivos y que reportan daños, tienen más probabilidades de tomar medidas contra las tortugas. Estas medidas incluyen poner cercas y tomar acciones físicas como desplazarlas o corretearlas.

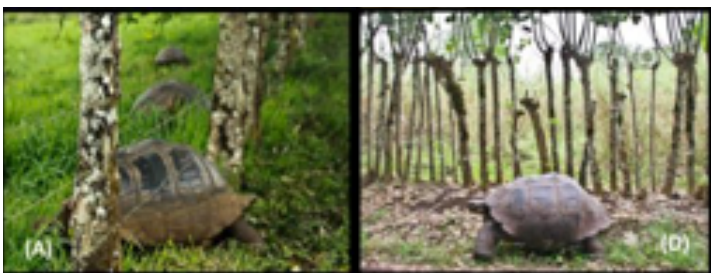

Ejemplos de cercas que permiten (A) o bloquean (D) el paso de las tortugas.

**Referencia:** Benítez-Capistrós et al. Emergent conservation conflicts in the Galapagos Islands: human-giant tortoise interactions in the rural area of Santa Cruz Island. *PLOS ONE* (in review).

## ¿A qué causan daños las tortugas y cuál es el costo?

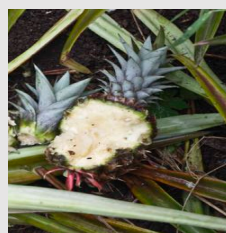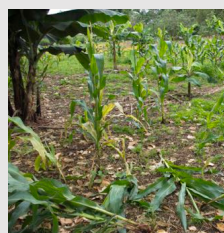

CULTIVOS

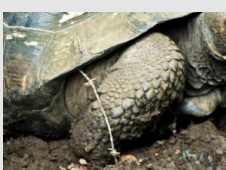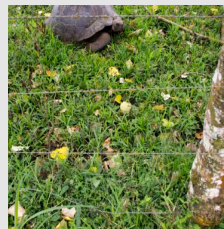

CERCAS

### ¿Qué costo tiene?

**Promedio de las pérdidas por daños**

**Cultivos:**  
2,8 USD/m<sup>2</sup>

**Cercas:**  
13 USD/m lineal

**NOTA:** Esta información económica es perceptual y aunque crítica para comprender la dimensión socioeconómica del conflicto, en el futuro debe ser verificada y cuantificada en el campo.

## ¿Cuándo y cuántas tortugas hay en el área rural de la Isla de Santa Cruz?

Las tortugas de Santa Cruz migran estacionalmente entre la zona baja del Parque Nacional y la parte alta rural de la isla. Esta migración ocurre principalmente por motivos de alimentación y reproducción. De Junio a Diciembre las tortugas migran de la parte baja a la parte alta. Este es el periodo máximo de interacción potencial con las actividades humanas. En cambio, el periodo de mínima interacción potencial corresponde a la temporada de Enero a Julio, temporada donde las tortugas bajan a la zona del parque. Nuestro estudio estimó entonces que la densidad de las tortugas gigantes en el área rural es de 76 individuos/km<sup>2</sup> en el periodo de interacción potencial mínima y de 185 individuos/km<sup>2</sup> en el periodo de interacción máxima.

### ÁREA RURAL DE SANTA CRUZ

Junio a Diciembre

Máxima interacción potencial

185 individuos/km<sup>2</sup>

Enero a Julio

Mínima interacción potencial

76 individuos/km<sup>2</sup>

## Programa de Ecología de Movimiento de las Tortugas de Galápagos

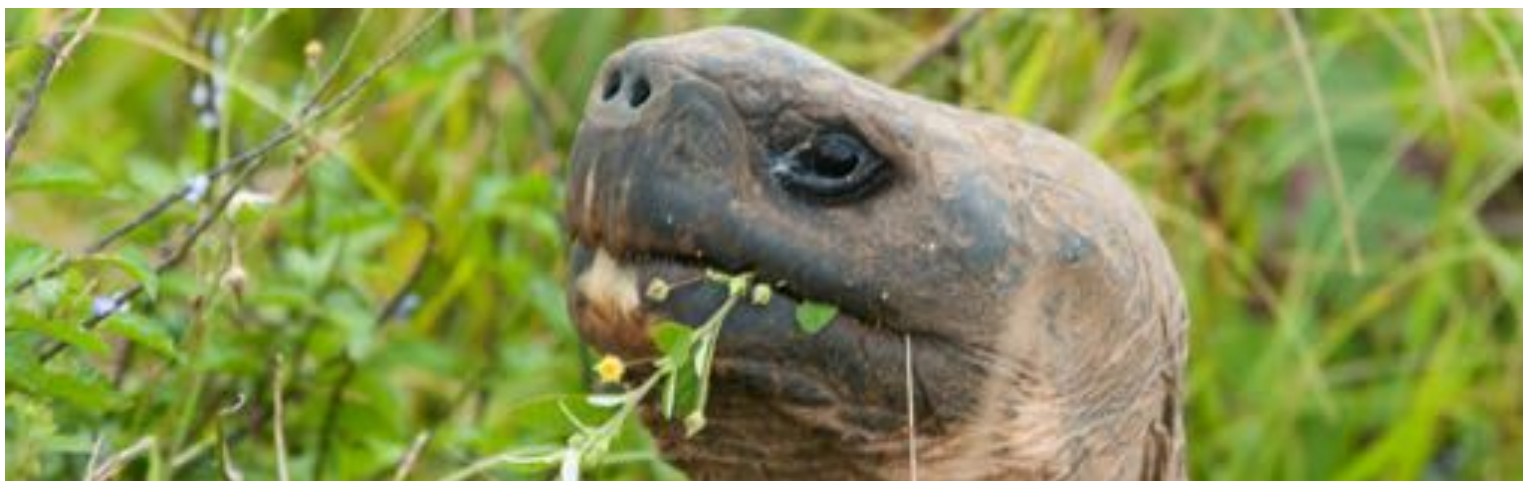

Tortuga gigante de Alcedo (*Chelonoidis vandenburgi*) alimentándose de *Sida rhombifolia* al borde del cráter

El **objetivo del Programa de Ecología de Movimiento de las Tortugas de Galápagos** es colaborar con el Parque Nacional Galápagos **para proteger de manera eficaz** a las Tortugas gigantes del archipiélago, mediante **estudios científicos aplicados e innovadores**, y el desarrollo de programas educativos basados en la experiencia y la participación ciudadana. Utilizamos dispositivos de rastreo con Sistemas de Posicionamiento Global (GPS), para determinar las estrategias de movimiento de las tortugas en tres islas, cada una de las cuáles cuenta con unas condiciones ecológicas bien diferenciadas. Queremos entender de esta manera por qué las tortugas migran. Tratamos así mismo de establecer de qué manera esta migración puede influenciar el estado de salud, la reproducción y la conservación de estas especies. Estamos interesados en comprender cómo se puede lograr la conservación de la tortuga en armonía con los propietarios de la tierra en hábitats importantes en tierras privadas fuera del parque nacional. Creemos firmemente en la utilidad de los estudios científicos de alto nivel, siempre y cuando esta información no quede relegada a la biblioteca de una universidad. Por este motivo, nuestro trabajo científico es traducido por un equipo de expertos educadores, para que sea aplicado en programas educativos, enfocados principalmente en la juventud de Galápagos.

### Dónde trabajamos:

Las tres islas en las que llevamos a cabo nuestro trabajo (derecha) constituyen una muestra representativa de las condiciones medioambientales a las que se enfrentan las tortugas en las Islas Galápagos. El Volcán Alcedo asciende hasta los 1100 metros y cuenta con un ecosistema árido en la zona costera baja, y húmedo y frondoso en las zona más alta que bordea el cráter. Santa Cruz, en el centro del archipiélago, cuenta también con zonas áridas y húmedas, y alberga la mayor población humana de Galápagos. En contraste, Española, en el extremo sureste, es inusualmente plana, caliente y carece de población humana.

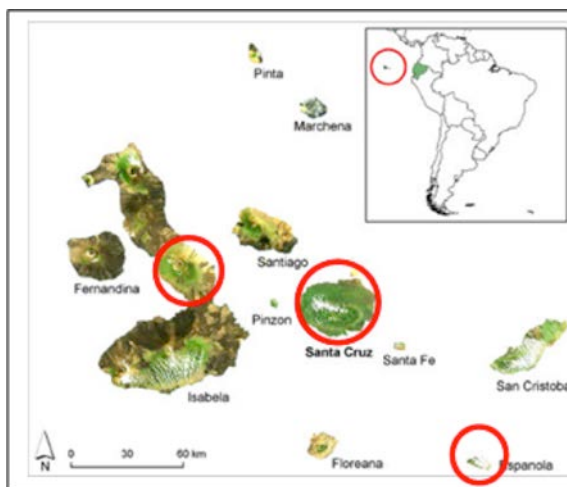

### Lo más destacado:

#### Las tortugas gigantes

- Reptiles terrestres más grandes
- Sólo se encuentran hoy en día en las Islas Galápagos y el atolón de Aldraba
- Pueden pesar 300kg y vivir más de 150 años
- Colonizaron Galápagos desde el continente Sudamericano hace 3 millones de años
- Sólo se encuentran en 6 de las 10 islas que antes habitaban
- Algunas de las especies se encuentran muy amenazadas

#### El programa

- Empezó en 2009
- Más de 100 tortugas marcadas con GPS o radios VHF, de 4 especies, en 3 islas
- Más de 800 jóvenes locales han participado en nuestros programas educativos, incluyendo salidas de campo
- Siete artículos científicos

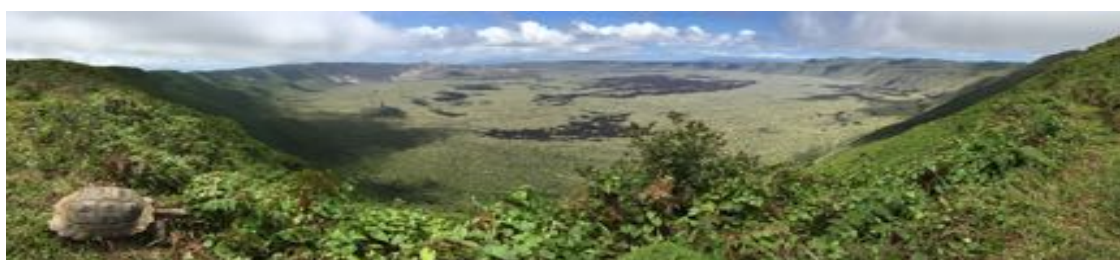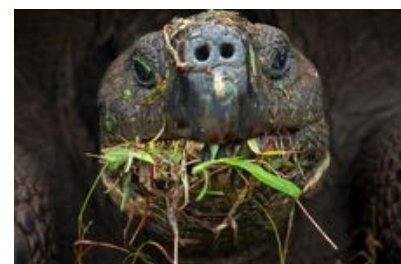



## Registrando el movimiento

Colocamos dispositivos GPS en los caparazones de las tortugas, usando resina epóxica. Éstos registran la posición cada hora, cuentan con una batería que puede durar 10 años. Estos datos proporcionan una idea muy detallada de sus movimientos, y pueden correlacionarse con factores ambientales (pluviosidad, temperatura, vegetación, uso de tierras), lo que nos permite, no solo entender la ecología de las tortugas, y identificar amenazas a sus migraciones. Por ejemplo, muchas tortugas adultas en Santa Cruz pasan la mitad del año en tierras privadas fuera del parque nacional.

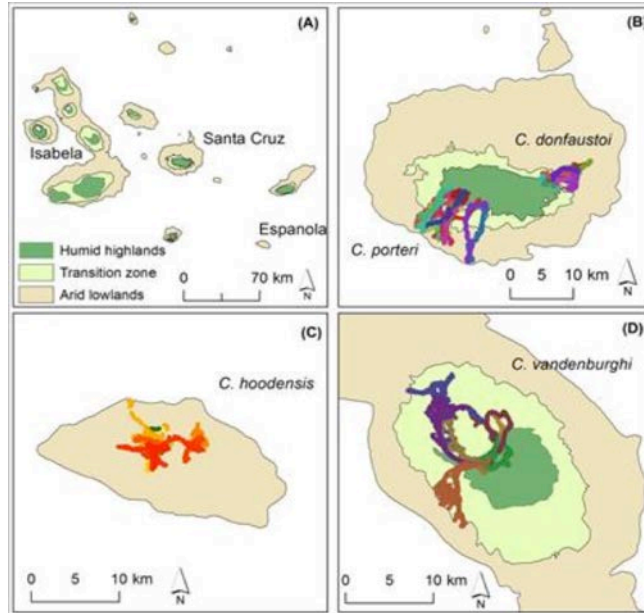

Tortugas a lo largo del archipiélago (A) migrando en Santa Cruz (B) y Alcedo (D), y más sedentarias en Española (C).

## Reproducción y salud de las tortugas

Estudiamos las relaciones que existen entre el movimiento de las tortugas, su salud y el éxito reproductivo. Esto resulta de vital importancia para entender la evolución migratoria y las posibles consecuencias derivadas de cambios climáticos y usos del suelo, especies invasoras, infraestructuras, etc. Tomamos muestras de sangre y heces y realizamos ultrasonido en busca de huevos. Medimos el éxito de incubación de los huevos y la supervivencia y movimiento de los neonatos, bajo diferentes condiciones ambientales. Estamos descubriendo cómo el movimiento influye en los parásitos, el riesgo de infección por infecciones bacterianas y virales, y la presencia de resistencia a los antibióticos.

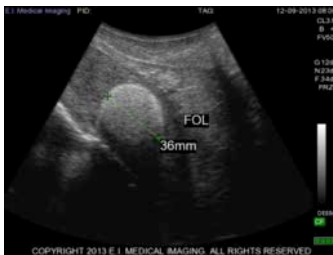

Ultrasonido de una hembra con huevos

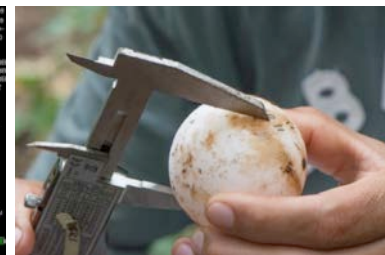

Medir el tamaño y peso de huevos

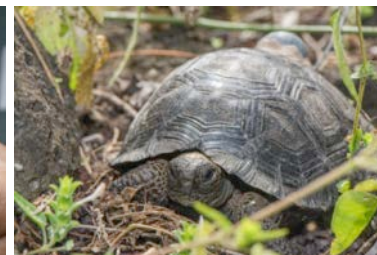

Movimientos y sobrevivencia de crías y juveniles

## Educación y divulgación

Traducimos nuestros resultados en herramientas útiles para la comunidad local, especialmente jóvenes y tomadores de decisiones e introducimos a los jóvenes en nuestro trabajo de campo, realizando actividades experienciales en colaboración con **Ecology Project International**. Hemos desarrollado también un paquete educativo que pueda ser implementado en colegios y escuelas de todo el mundo, en conjunto con Galápagos Conservation Trust y el Zoológico de Saint Louis.

## Interacciones entre tortugas y humanos

Estamos colaborando con la población local y las instituciones locales para comprender mejor la naturaleza de las interacciones humano-tortuga en tierras privadas. Esperamos que este trabajo conduzca al desarrollo y la implementación de políticas de uso de la tierra en las islas habitadas de Galápagos que reconciliarán los objetivos comunes de desarrollo socio-económicos de las tierras privadas y mantener la migración de tortugas terrestres a larga distancia y la salud de la población.

## Lo más destacado:

### Ecología de movimiento

- Las tortugas migran en aquellas islas donde existen grandes diferencias geográficas o estacionales que determinan la disponibilidad de alimento. Esto sucede en islas grandes, con zonas áridas bajas y zonas altas húmedas.
- Las tortugas realizan largas migraciones de ida y vuelta, de hasta 20km en Santa Cruz y 40km en Alcedo.
- Las tortugas migrantes suelen emplear las mismas rutas y llegar al mismo destino final.
- La dieta incluye más de 60 especies de plantas, incluyendo frutas y especies invasoras como la guava.
- Las tortugas ingieren gran cantidad de semillas, las cuáles dispersan en grandes pilas de estiércol, convirtiéndolas en “las jardineras de Galápagos”.

### Colaboradores y Donantes

- Parque Nacional Galápagos
- Fundación Charles Darwin
- Instituto de Ornitología Max Planck
- Fundación Nacional de Ciencias
- SUNY-ESF
- E-obs GmbH
- Zoológico de Saint Louis
- Ecology Project International
- Zoológico de Houston
- Galapagos Conservation Trust
- Amigos Suizos de Galápagos
- National Geographic Society

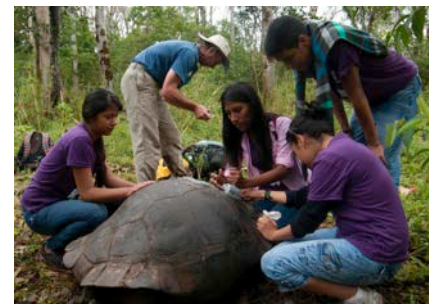

**Contactos:** Coordinador Stephen Blake [stephen.blake@gianttortoise.org](mailto:stephen.blake@gianttortoise.org), Técnico principal de campo Freddy Cabrera [fredy.cabrera@fcdarwin.org.ec](mailto:fredy.cabrera@fcdarwin.org.ec), Especialistas en salud tortugas Sharon Deem [dee@stlzoo.org](mailto:dee@stlzoo.org) y Ainoa Nieto [ainoa.nieto@fcdarwin.org.ec](mailto:ainoa.nieto@fcdarwin.org.ec), Coordinador de educación Anne Guezou [anne.guezou8@gmail.com](mailto:anne.guezou8@gmail.com), Coordinador estudios sociales Francisco Benitez [franbenitezcap@yahoo.com](mailto:franbenitezcap@yahoo.com)
