# Supplementary material
Source: MDPI journal article supplement (https://www.mdpi.com/2071-1050/11/10/2937)
Supplement: s1 [file s1]

## APPENDIX D: NGT RESULTS OF THE VOTING AND RANKING EXERCISE

**Table D1.** Results of the first NGT application, scoring the benefits of GTs in Galapagos

| List of priorities for benefits <sup>(PB)</sup>                                      | Scoring by group |    |    | Total Sum | Share of votes (%) |
|--------------------------------------------------------------------------------------|------------------|----|----|-----------|--------------------|
|                                                                                      | G1               | G2 | G3 |           |                    |
| PB1 <i>GTs are unique animals in the world</i> <sup>1</sup>                          | 5                | 5  | 5  | 15        | 100*               |
| PB2 GTs are important for tourism and the economy                                    | 5                | 5  | 5  | 15        | 100*               |
| PB3 GTs are important for science                                                    | 5                | 5  | 5  | 15        | 100*               |
| PB4 <i>GTs are important for conservation</i> <sup>1</sup>                           | 5                | 5  | 5  | 15        | 100*               |
| PB5 GTs are the engineers and <i>modelers</i> <sup>1</sup> of the islands ecosystems | 4                | 5  | 5  | 14        | 93*                |
| PB6 <i>GTs are important for local production brands</i> <sup>1</sup>                | 5                | 5  | 4  | 14        | 93*                |
| PB7 GTs are charismatic and <i>impressive</i> <sup>1</sup> animals                   | 4                | 5  | 5  | 14        | 93*                |
| PB8 GTs are important for our identity                                               | 3                | 5  | 5  | 13        | 87*                |
| PB9 <i>GTs provide a possibility to open a farm for tourism</i> <sup>1</sup>         | 4                | 3  | 5  | 12        | 80*                |
| PB10 <i>GTs allow the restoration of flora</i> <sup>1</sup>                          | 3                | 3  | 5  | 11        | 73                 |
| PB11 <i>GTs facilitate the incorporation of organic matter (feces)</i> <sup>1</sup>  | 2                | 2  | 3  | 7         | 47                 |

<sup>1</sup> Italics are the modified or new ideas and statements generated during the NGT application.

\* Top listed priorities with >75% of votes

**Table D2.** Results of the first NGT application, scoring GTs migration problems in Santa Cruz

| List of priorities for migration problems <sup>(PM)</sup>                                                                                          | Scoring by group |    |    | Total Sum | Share of votes (%) |
|----------------------------------------------------------------------------------------------------------------------------------------------------|------------------|----|----|-----------|--------------------|
|                                                                                                                                                    | G1               | G2 | G3 |           |                    |
| PM1 <i>Ecosystem disturbances</i> <sup>1</sup>                                                                                                     | 5                | 5  | 5  | 15        | 100*               |
| PM2 GTs migratory routes are blocked by land abandonment and the growth of invasive plants such as the blackberry (vegetative barrier)             | 4                | 5  | 5  | 14        | 93*                |
| PM3 GTs migratory routes are blocked due to the use of fences                                                                                      | 3                | 5  | 5  | 13        | 87                 |
| PM4 <i>Invasive species (e.g. pigs and ants)</i> <sup>1</sup>                                                                                      | 5                | 3  | 5  | 13        | 87*                |
| PM5 <i>Interaction with tourists</i> <sup>1</sup>                                                                                                  | 4                | 5  | 4  | 13        | 87*                |
| PM6 GTs migratory routes are blocked by the subdivision of lands                                                                                   | 3                | 4  | 5  | 12        | 80*                |
| PM7 <i>Climate change</i> <sup>1</sup>                                                                                                             | 4                | 4  | 4  | 12        | 80*                |
| PM8 Main and secondary roads can be a problem to GTs due to the possible collisions with automobiles and the fragmentation of GTs migratory routes | 3                | 3  | 5  | 11        | 73                 |
| PM9 <i>Intoxication by garbage, pesticides and disinfectant products</i> <sup>1</sup>                                                              | 3                | 5  | 3  | 11        | 73                 |
| PM10 <i>Reproduction alterations due to consumption of contaminated products</i> <sup>1</sup>                                                      | 1                | 4  | 5  | 10        | 67                 |

| List of priorities for migration problems <sup>(PM)</sup>                                                        | Scoring by group |    |    | Total Sum | Share of votes (%) |
|------------------------------------------------------------------------------------------------------------------|------------------|----|----|-----------|--------------------|
|                                                                                                                  | G1               | G2 | G3 |           |                    |
| PM11 <i>Lack of food in the national park PA</i> <sup>1</sup>                                                    | 4                | 3  | 3  | 10        | 67                 |
| PM12 <i>Burning of brushwood (incineration)</i> <sup>1</sup>                                                     | 1                | 5  | 4  | 10        | 67                 |
| PM13 <i>GTs health problems caused by the close interaction with cattle (e.g. due to the use of antibiotics)</i> | 2                | 1  | 5  | 8         | 53                 |
| PM14 <i>Pesticides</i> <sup>1</sup>                                                                              | 4                | 3  | 1  | 8         | 53                 |
| PM15 <i>Barbed wire can hurt GTs</i>                                                                             | 1                | 4  | 3  | 8         | 53                 |
| PM16 <i>Consumption of fruits that GTs can not digest and cause health problems</i> <sup>1</sup>                 | 1                | 1  | 3  | 5         | 33                 |

<sup>1</sup> Italics are the modified or new ideas and statements generated during the NGT application.

\* Top listed priorities with >75% of votes

**Table D3.** Results of the first NGT application, scoring the problems GTs cause in lands/activities

| List of priorities for problems GTs cause (PP)                            | Scoring by group |    |    | Total Sum | Share of votes (%) |
|---------------------------------------------------------------------------|------------------|----|----|-----------|--------------------|
|                                                                           | G1               | G2 | G3 |           |                    |
| PP1 <i>GTs destroy short cycle crops</i>                                  | 5                | 5  | 5  | 15        | 100*               |
| PP2 <i>GTs generate economic expenses</i>                                 | 4                | 5  | 5  | 14        | 93*                |
| PP3 <i>GTs destroy growing perennial crops (e.g. coffee)</i>              | 5                | 4  | 4  | 13        | 87*                |
| PP4 <i>GTs break/damage</i> <sup>1</sup> <i>fences</i>                    | 3                | 5  | 4  | 12        | 80*                |
| PP5 <i>GTs leave feces with invasive species</i> <sup>1</sup>             | 3                | 4  | 3  | 10        | 67                 |
| PP6 <i>GTs spread invasive species (blackberry)</i> <sup>1</sup>          | 3                | 1  | 5  | 9         | 60                 |
| PP7 <i>GTs take the water and food (pastures) from cattle</i>             | 2                | 4  | 2  | 8         | 53                 |
| PP8 <i>GTs spread seeds</i> <sup>1</sup>                                  | 3                | 4  | 1  | 8         | 53                 |
| PP9 <i>GTs compete with cattle for their feeding pasture</i> <sup>1</sup> | 2                | 4  | 1  | 7         | 47                 |
| PP10 <i>GTs block the road and access roads to land properties</i>        | 2                | 1  | 3  | 6         | 40                 |
| PP11 <i>GTs damage life fences</i> <sup>1</sup>                           | 2                | 3  | 1  | 6         | 40                 |
| PP12 <i>GTs erode and deplete soil</i> <sup>1</sup>                       | 1                | 1  | 3  | 5         | 33                 |

<sup>1</sup> Italics are the modified or new ideas and statements generated during the NGT application.

\* Top listed priorities with >75% of votes

**Table D4.** Results of the first NGT application, scoring the solutions, strategies and actions to the conflict

| List of priorities for strategies and actions (PS)                                                                                                     | Scoring by group |    |    | Total Sum | Share of votes (%) |
|--------------------------------------------------------------------------------------------------------------------------------------------------------|------------------|----|----|-----------|--------------------|
|                                                                                                                                                        | G1               | G2 | G3 |           |                    |
| PS1 <i>Design fences that do not cause damage to GTs nor landowners as well as ecological corridors that allow GTs migration across the rural area</i> | 5                | 5  | 5  | 15        | 100*               |
| PS2 <i>Promoting and sharing good and existing practices to protect GTs</i> <sup>1</sup>                                                               | 5                | 5  | 5  | 15        | 100*               |
| PS3 <i>Design policies and provide incentives to integrate</i>                                                                                         | 5                | 5  | 5  | 15        | 100*               |

| List of priorities for strategies and actions (PS)                                                                                          | Scoring by group |    |    | Total Sum | Share of votes (%) |
|---------------------------------------------------------------------------------------------------------------------------------------------|------------------|----|----|-----------|--------------------|
|                                                                                                                                             | G1               | G2 | G3 |           |                    |
| <i>agriculture and tourism</i> <sup>1</sup>                                                                                                 |                  |    |    |           |                    |
| PS4 <i>Communicate to the community the studies, results and identified problems (lack of socialization of projects)</i> <sup>1</sup>       | 5                | 5  | 5  | 15        | 100*               |
| PS5 <i>Build and respect ecological corridors</i> <sup>1</sup>                                                                              | 5                | 5  | 5  | 15        | 100*               |
| PS6 Promote the local agricultural market, in particular, for those whose subsistence is based solely on agriculture                        | 5                | 3  | 5  | 13        | 87*                |
| PS7 <i>Set specific fences only in cultivated areas of farms so that giant tortoises can pass through the rest of the farm</i> <sup>1</sup> | 5                | 5  | 3  | 13        | 87*                |
| PS8 <i>Cleaning campaigns in GTs nesting areas</i> <sup>1</sup>                                                                             | 1                | 4  | 5  | 10        | 67                 |
| PS9 <i>Promote campaigns to eliminate Cedrela spp. and other introduced species</i> <sup>1</sup>                                            | 5                | 4  | 1  | 10        | 67                 |
| PS10 <i>Sowing food in the national park area</i> <sup>1</sup>                                                                              | 1                | 3  | 4  | 8         | 53                 |
| PS11 Provide economic incentives for the construction of tourism infrastructure instead of agriculture                                      | 1                | 5  | 1  | 7         | 47                 |
| PS12 Promote crops that are not damaged by tortoises such as: oranges, cocoa, and teak for wood                                             | 1                | 3  | 3  | 7         | 47                 |
| PS13 <i>Sowing low grass in farms of dry sectors which are dedicated to giant tortoises</i> <sup>1</sup>                                    | 3                | 3  | 1  | 7         | 47                 |
| PS14 Build and establish more fences (not harmful) on the side of the GNP                                                                   | 1                | 1  | 2  | 4         | 27                 |

<sup>1</sup> Italics are the modified or new ideas and statements generated during the NGT application

\* Top listed priorities with >75% of votes
